# Supplementary material
Source: Research Square preprint supplement (doi:10.21203/rs.3.rs-8915427/v1)

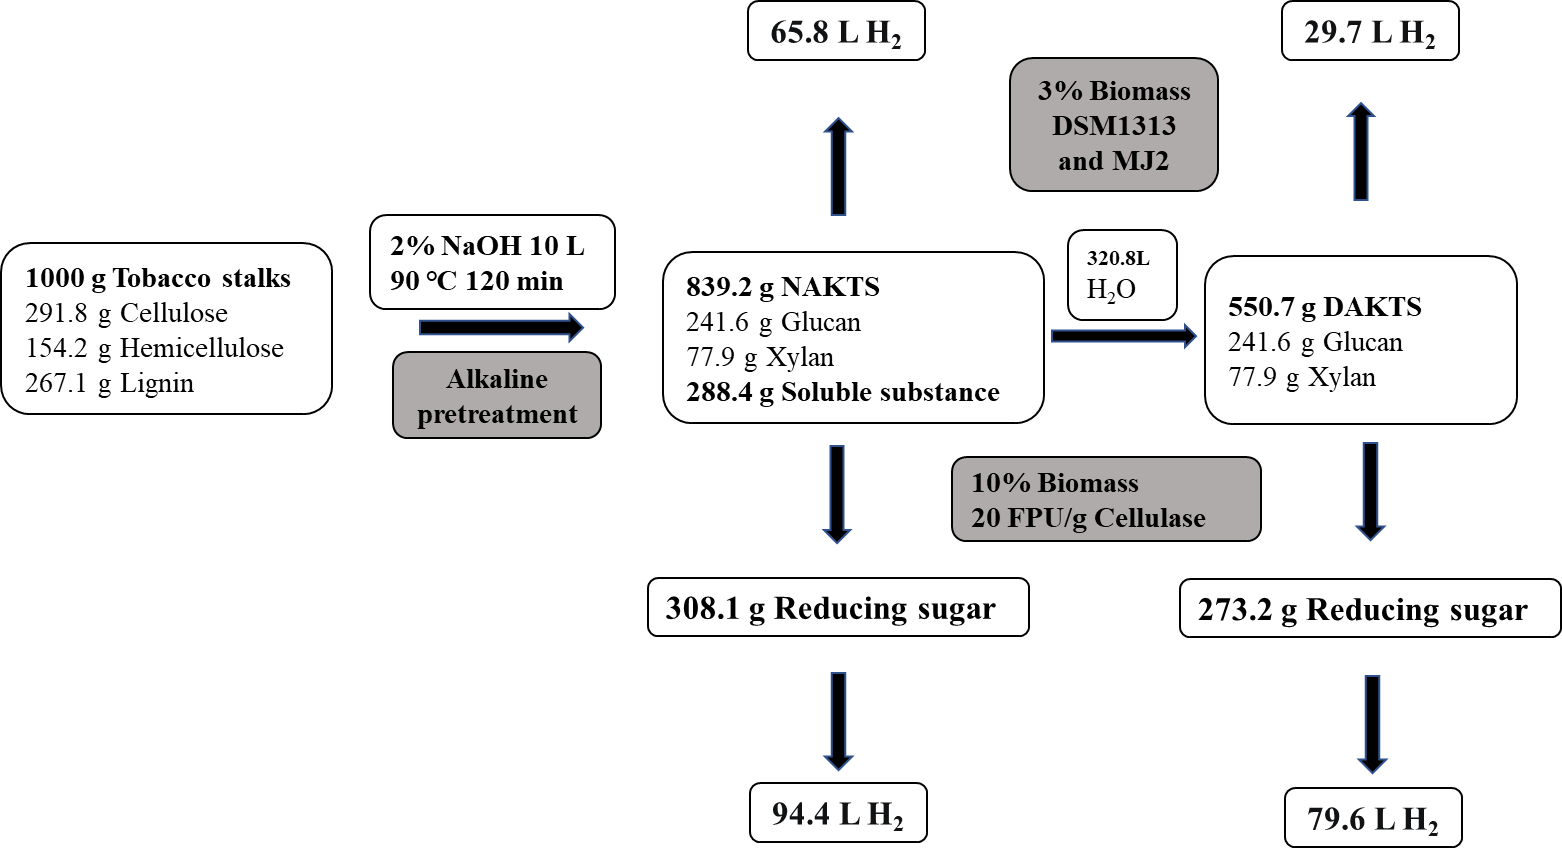


**Fig. A1** Mass balance for tobacco stalks with hydrogen production.

Supplement: Supplementary file 1 [file eb33051590d987706616fb58.docx]
